# Supplementary material for: Quick speciation of iron(ii) and iron(iii) in natural samples using a selective fluorescent carbon dot-based probe
Source: Royal Society of Chemistry journal article supplement (doi:10.1039/c6ay00083e), 2016-01-01
Supplement: c6ay00083e1.pdf [file c6ay00083e1.pdf]

## Supporting Information

### **Quick Speciation of Iron (II) and Iron (III) in Natural Samples Using a Selective Fluorescent Carbon Dot Based Probe**

M.Reza Hormozi-Nezhad<sup>\*1,2</sup>, M. Taghipour<sup>1</sup>

*1) Department of Chemistry, Sharif University of Technology, Tehran, 11155-9516, Iran*

*2) Institute for Nanoscience and Nanotechnology, Sharif University of Technology,  
Tehran, P.O. Box 11365-9161, Iran*

\* Corresponding author at: Department of Chemistry, Sharif University of Technology

Tel.: +98 2166165337; Fax: +98 2166029165

E-mail addresses: [hormozi@sharif.edu](mailto:hormozi@sharif.edu)

### **Real Sample Pretreatment**

A 10 ml solution including 0.5 ml of concentrated hydrochloric acid was added to a beaker containing 0.2 g of dry and ground spinach followed by heating up to the 150 °C on a hot plate for 2 h [1]. Then, the digest was filtered and brought to the specified volume.

**Legend of figures:**

**Figure S 1.** FTIR spectra of CDs and citric acid.

**Figure S 1**

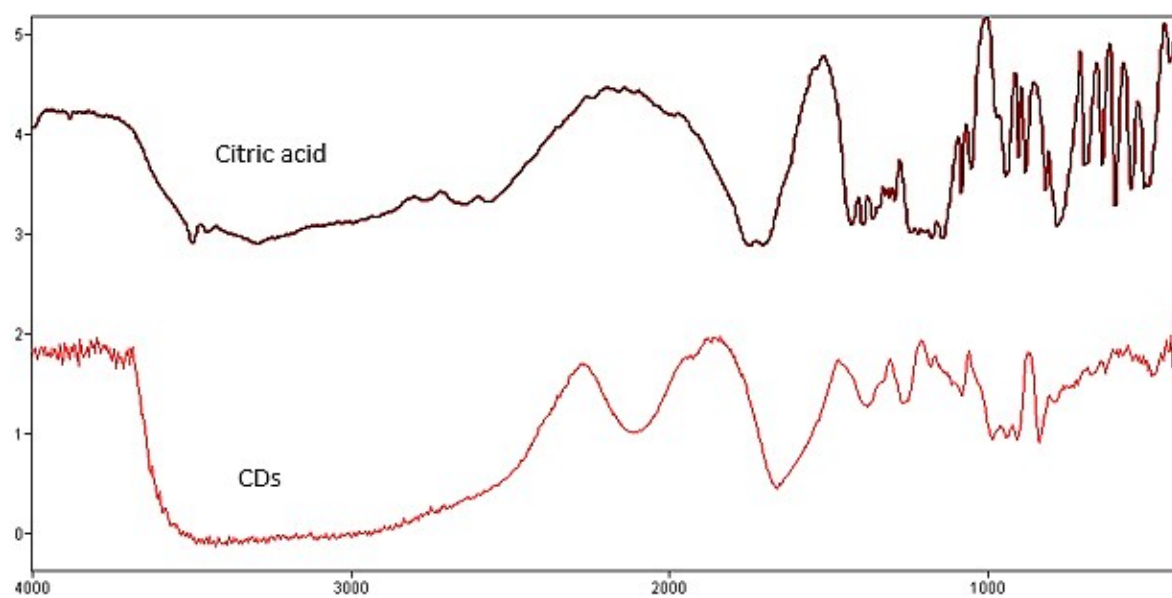

**Reference:**

- (1) Chen, J. L.; Zhuo, S. J.; Wu, Y. Q.; Fang, F.; Li, L.; Zhu, C. Q. *Spectrochim. Acta, Part A*. **2006**, 63, 438–443.
